# Supplementary material for: Construction of an FeNi-Mo2C@SiO2monolith electrocatalyst with an increased number of active sites and enhanced intrinsic activity toward water oxidation
Source: Royal Society of Chemistry journal article supplement (doi:10.1039/d2nj06178c), 2023-01-01
Supplement: d2nj06178c1.pdf [file d2nj06178c1.pdf]

## Supporting Information

### **Construction of FeNi-Mo<sub>2</sub>C@SiO<sub>2</sub> monolith electro catalyst with increased active sites and enhanced intrinsic activity toward water oxidation**

Huanyu Chen, Jia-Qi Bai, Yuxue Wei, Jingshuai Chen,\* Song Sun, and Chang-Jie

Mao

Key Laboratory of Structure and Functional Regulation of Hybrid Materials (Ministry of Education), School of Chemistry and Chemical Engineering, Anhui University,

Hefei, Anhui 230601, China.

E-mail: chen\_jshuai@ahu.edu.cn

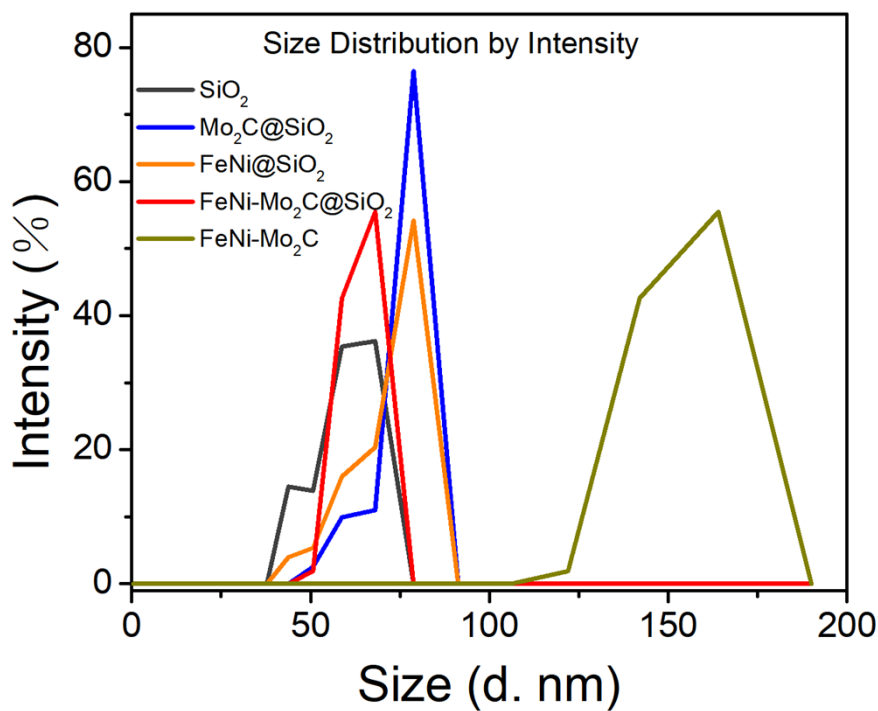

Figure S1 Size distributions measured by Malvern laser particle size analyzer.

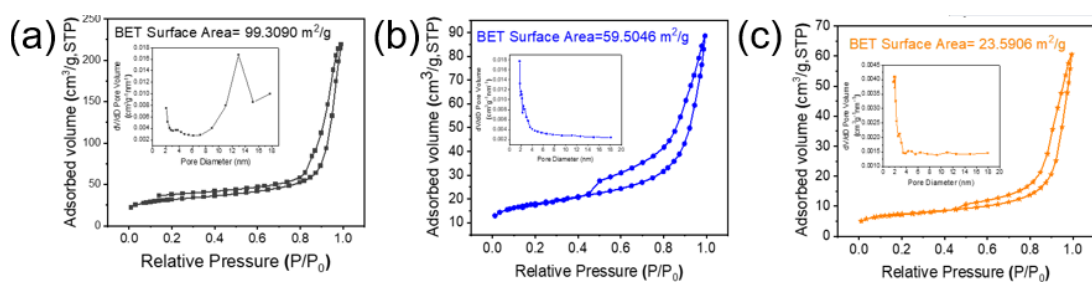

Figure S2  $N_2$  adsorption-desorption isotherms and pore size distribution (inset) of (a)  $SiO_2$ , (b)  $Mo_2C@SiO_2$  and (c)  $FeNi-Mo_2C$ .

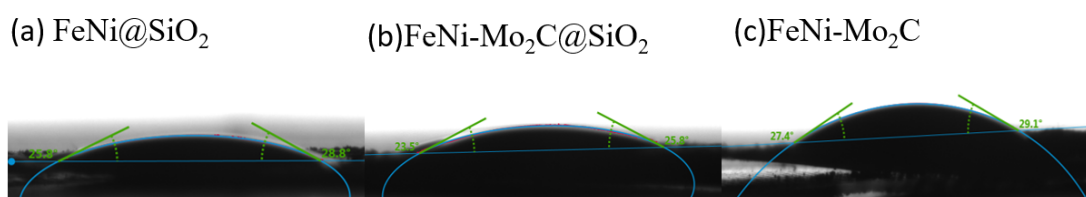

Figure S3 Contact angles of (a) FeNi@SiO<sub>2</sub>, (b) FeNi-Mo<sub>2</sub>C@SiO<sub>2</sub>, (c) FeNi-Mo<sub>2</sub>C.

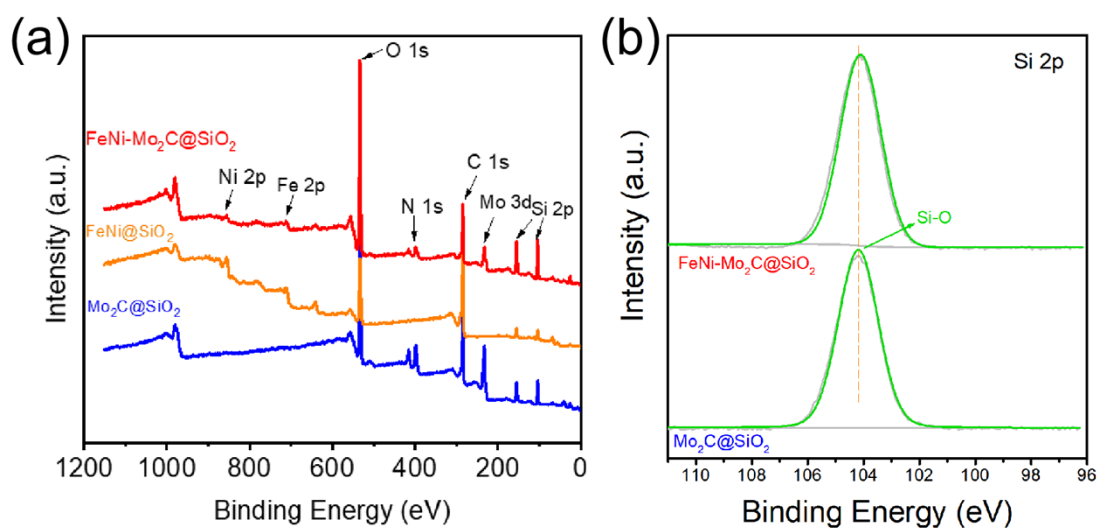

Figure S4 (a) XPS patterns of survey scan of FeNi-Mo<sub>2</sub>C@SiO<sub>2</sub>, FeNi@SiO<sub>2</sub> and Mo<sub>2</sub>C@SiO<sub>2</sub>. (b) High-resolution spectra of Si 2p of Mo<sub>2</sub>C@SiO<sub>2</sub> and FeNi-Mo<sub>2</sub>C@SiO<sub>2</sub>.

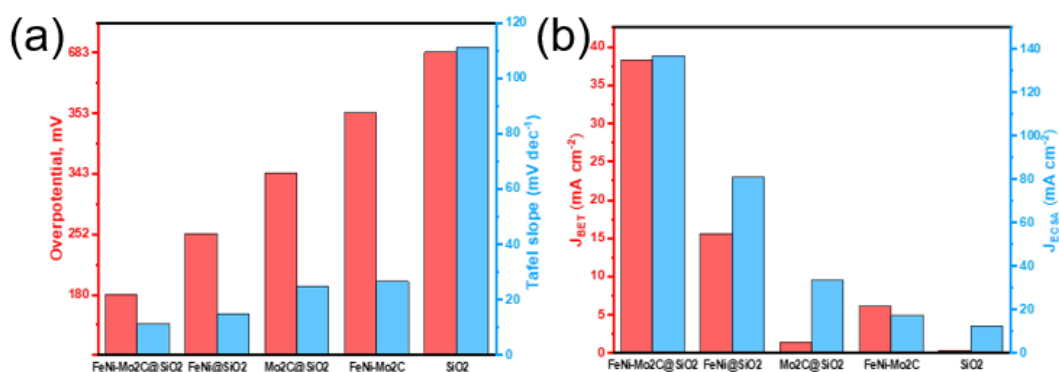

Figure S5 (a) Overpotential (red pillar) and Tafel slope (green pillar). (b) Comparison of BET surface area and ECSA normalized current density at 1.8 V (v

s. RHE).

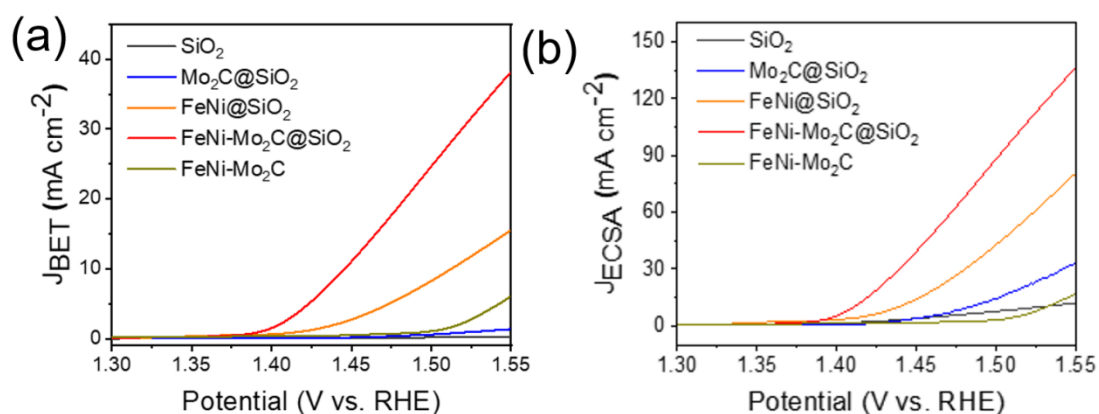

Figure S6 (a) BET surface and (b) ECSA area normalized LSV curves for  $\text{SiO}_2$ ,  $\text{FeNi@SiO}_2$ ,  $\text{Mo}_2\text{C@SiO}_2$ ,  $\text{FeNi-Mo}_2\text{C}$  and  $\text{FeNi-Mo}_2\text{C@SiO}_2$ .

Table S1. OER activity comparison of  $\text{FeNi-Mo}_2\text{C@SiO}_2$  catalyst with other FeNi-based, Ni-based or Mo-based electrocatalysts in 1.0 M KOH.

| Catalyst                                           | Overpotential (mV) at 10 mA cm <sup>-2</sup> | Tafel slope (mV dec <sup>-1</sup> ) | Reference                                |
|----------------------------------------------------|----------------------------------------------|-------------------------------------|------------------------------------------|
| $\text{FeNi-Mo}_2\text{C@SiO}_2$                   | 180                                          | 11.0                                | This work                                |
| $\text{Gd-NiFe-LDH@CC}$                            | 210                                          | 40.9                                | J. Mater. Chem. A, 2021, 9, 2999-3006.   |
| $\text{NiFeO}_x\text{H}_y\text{-C/CNTs/C}$<br>FP   | 202                                          | 38.2                                | Chin. J. Catal., 2022, 9, 2354-2362.     |
| 60% $\text{Fe}_{0.5}\text{Ni}_{0.5}/40\% \text{C}$ | 219                                          | 23.2                                | Small, 2022, 18, 2203340.                |
| $\text{FeNi}(\text{MoO}_4)_x\text{@NF}$            | 227                                          | 47.5                                | Adv. Funct. Mater., 2022, 32, 2107342    |
| $\text{Fe}_1\text{Ni}_4\text{-HHTP NWs}$           | 213                                          | 96                                  | J. Mater. Chem. A, 2019, 7, 10431–10438. |
| $(\text{Ni, Co})_{0.85}\text{Se}$                  | 255                                          | 79                                  | Adv. Mater., 2016, 28, 77.               |

|                                                           |       |      |                                                                       |
|-----------------------------------------------------------|-------|------|-----------------------------------------------------------------------|
| $(\text{Ni}_{0.77}\text{Fe}_{0.23})\text{Se}_2/\text{CC}$ | 228   | 69   | J. Mater. Chem. A, 2019, 7, 2831-2837.                                |
| $\text{NiCoSe}_2/\text{CC}$                               | 255.8 | 71   | J. Mater. Chem. A, 2018, 6, 17353-17360.<br>Small, 2018, 14, 1800763. |
| $\text{NiSe-Ni}_{0.85}\text{Se}/\text{CP}$                | 300   | 98   | Appl. Catal., B, 2019, 247, 107-114.                                  |
| $(\text{Ni,Fe})\text{S}_2@\text{MoS}_2/\text{CP}$         | 270   | 43.2 | Mater. Today Energy, 2019, 11, 192-198.                               |
| $\text{Ni}_{0.8}\text{Fe}_{0.2}\text{-P}/\text{CC}$       | 278   | 41.2 | J. Mater. Chem. A, 2018, 6, 3224-3230.                                |
| $\text{S-NiCoFe LDH}$                                     | 206   | 46   |                                                                       |

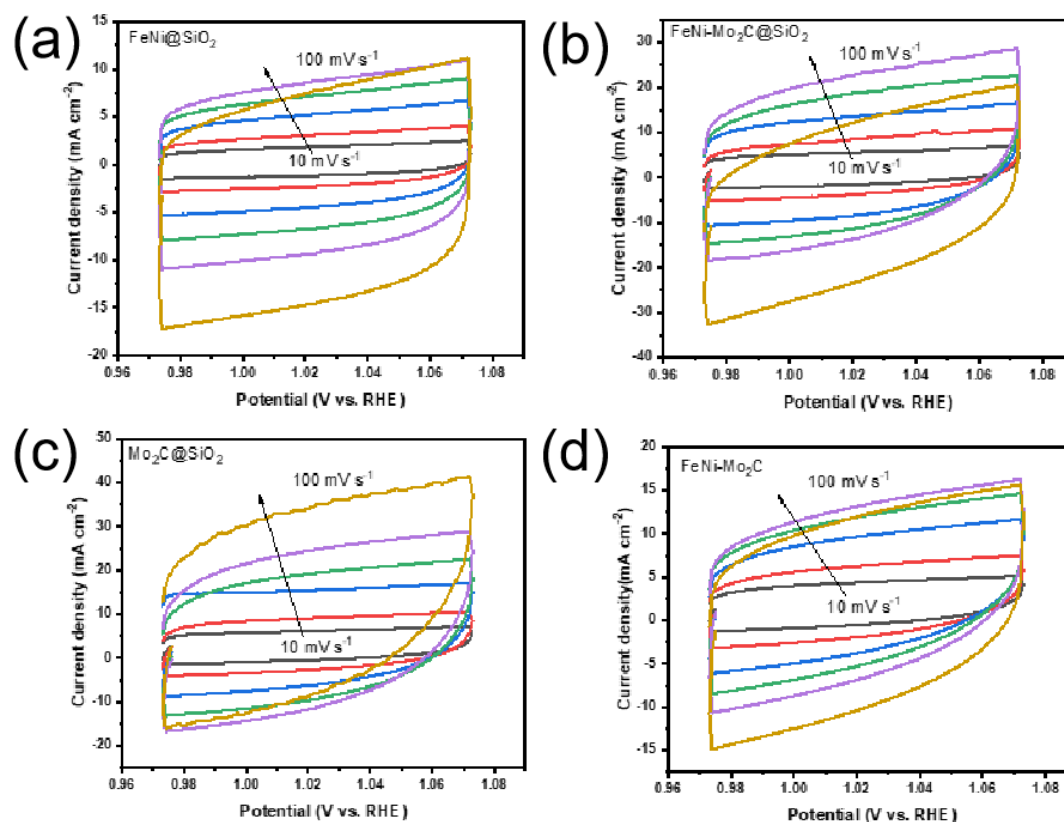

Figure S7 CVs from 10 to 100  $\text{mV s}^{-1}$  in a potential window between -0.05 V and 0.05 V (vs. Ag/AgCl) in 1 M KOH electrolyte: (a)  $\text{FeNi}@/\text{SiO}_2$ , (b)  $\text{Mo}_2\text{C}@/\text{SiO}_2$ , (c)  $\text{FeNi-Mo}_2\text{C}@/\text{SiO}_2$  and (d)  $\text{FeNi-Mo}_2\text{C}$ .

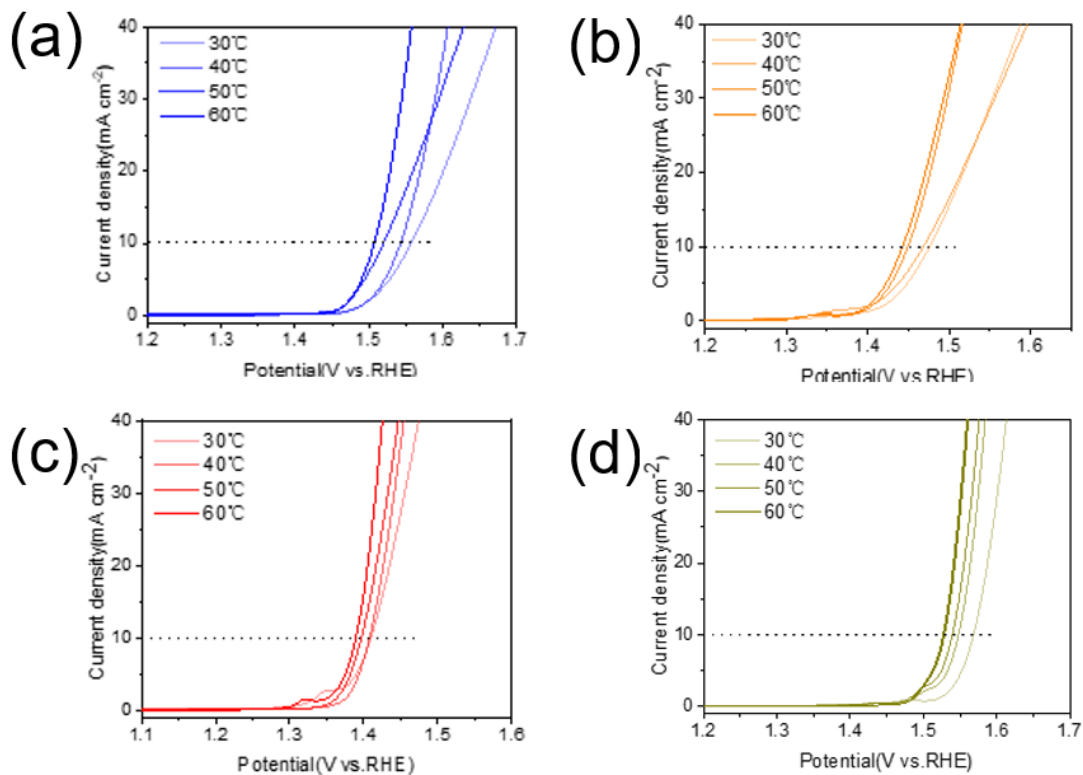

Figure S8 LSV curves recorded by increasing the electrolyte temperature for (a)  $\text{Mo}_2\text{C}@/\text{SiO}_2$ , (b)  $\text{FeNi}@/\text{SiO}_2$ , (c)  $\text{FeNi-Mo}_2\text{C}@/\text{SiO}_2$  and (d)  $\text{FeNi-Mo}_2\text{C}$ .

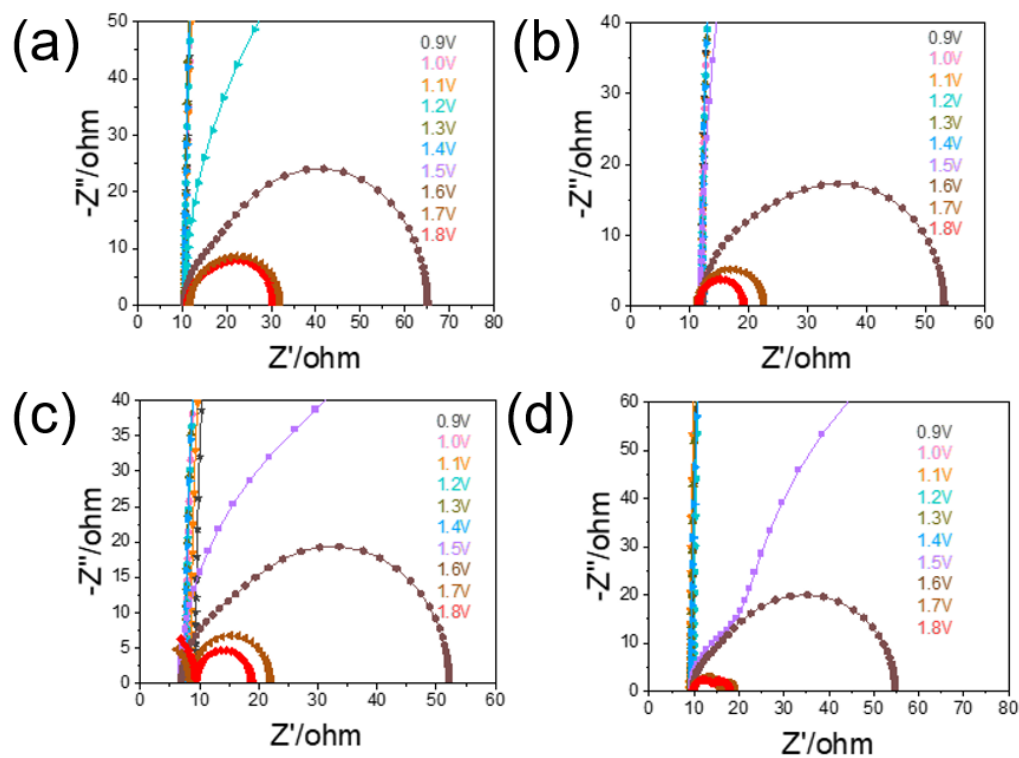

Figure S9 In-situ Electrochemical impedance recorded at potentials from 0.9 to 1.8 V (vs. RHE) for (a)  $\text{Mo}_2\text{C}@/\text{SiO}_2$ , (b)  $\text{FeNi}@/\text{SiO}_2$ , (c)  $\text{FeNi-Mo}_2\text{C}@/\text{SiO}_2$  and (d)  $\text{FeNi-Mo}_2\text{C}$ .

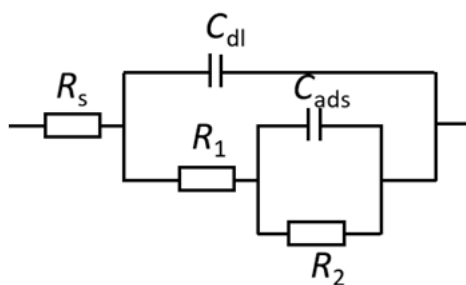

Figure S10 Equivalent circuit model.  $R_s$  represents a series resistance,  $R_{ct}$  refers to the total charge transfer resistance ( $R_{ct} = R_1 + R_2$ ),  $C_{dl}$  and  $C_{ads}$  correspond to the double-layer capacitance and the intermediate adsorbed capacitance, respectively.

Table S2 Resistance and capacitance obtained by analysing the EIS spectra.

| Samples                            | Potential<br>(V vs.RHE) | $R_s$ ( $\Omega$ ) | $R_1$ ( $\Omega$ ) | $C_{dl}$ ( $\mu$ F) | $R_2$ ( $\Omega$ ) | $C_{ads}$ ( $\mu$ F) | $R_{ct}$ ( $\Omega$ ) |
|------------------------------------|-------------------------|--------------------|--------------------|---------------------|--------------------|----------------------|-----------------------|
| Mo <sub>2</sub> C@SiO <sub>2</sub> | 0.9                     | 34.86              | 10.73              | 11.75               | 1739               | 15.31                | 1749.73               |
|                                    | 1.0                     | 39.32              | 10.71              | 11.65               | 1826               | 15.73                | 1836.71               |
|                                    | 1.1                     | 30.89              | 10.66              | 12.28               | 1692               | 14.9                 | 1702.66               |
|                                    | 1.2                     | 20.79              | 10.63              | 12.9                | 1989               | 17.85                | 1999.63               |
|                                    | 1.3                     | 14.5               | 10.65              | 13.23               | 2859               | 22.32                | 2869.65               |
|                                    | 1.4                     | 12.71              | 10.66              | 13.49               | 2524               | 23.15                | 2534.66               |
|                                    | 1.5                     | 5.06               | 10.68              | 14.42               | 157.9              | 22.89                | 168.58                |
|                                    | 1.6                     | 12.98              | 10.47              | 15.43               | 20.61              | 20.27                | 31.08                 |
|                                    | 1.7                     | 7.726              | 11.29              | 14.47               | 11.52              | 20.49                | 22.81                 |
| FeNi@SiO <sub>2</sub>              | 0.9                     | 21.43              | 12.11              | 14.29               | 1804               | 20.96                | 1816.11               |
|                                    | 1.0                     | 21.8               | 12.12              | 14.01               | 1797               | 19.29                | 1809.12               |
|                                    | 1.1                     | 21.41              | 12.13              | 14.79               | 1831               | 19.05                | 1843.13               |
|                                    | 1.2                     | 18.18              | 12.13              | 15.87               | 1787               | 21.17                | 1799.13               |
|                                    | 1.3                     | 15.23              | 12.13              | 17.14               | 1870               | 35.69                | 1882.13               |
|                                    | 1.4                     | 13.62              | 12.14              | 17.64               | 1915               | 39.46                | 1927.14               |
|                                    | 1.5                     | 5.135              | 12.03              | 22.49               | 637.4              | 34.35                | 629.43                |
|                                    | 1.6                     | 16.85              | 12.17              | 16.28               | 24.1               | 37                   | 36.27                 |
|                                    | 1.7                     | 1.207              | 11.43              | 15.72               | 10.06              | 45.98                | 21.49                 |
|                                    | 0.9                     | 13.87              | 38.53              | 18.63               | 1409               | 41.33                | 1447.53               |
|                                    | 1.0                     | 13.87              | 49.35              | 19.16               | 1563               | 40                   | 1612.35               |



|                                         |     |       |       |        |       |        |         |
|-----------------------------------------|-----|-------|-------|--------|-------|--------|---------|
| FeNi-Mo <sub>2</sub> C@SiO <sub>2</sub> | 1.1 | 13.36 | 37.76 | 19.45  | 1381  | 39.58  | 1418.76 |
|                                         | 1.2 | 12.89 | 37.73 | 20.34  | 1423  | 41.28  | 1460.73 |
|                                         | 1.3 | 11.29 | 37.62 | 20.9   | 1354  | 44.01  | 1391.62 |
|                                         | 1.4 | 10.29 | 37.63 | 21.44  | 1312  | 45.2   | 1349.63 |
|                                         | 1.5 | 2.232 | 36.79 | 30.08  | 79.31 | 75.43  | 116.1   |
|                                         | 1.6 | 3.385 | 45.96 | 27.24  | 11.14 | 64.87  | 57.1    |
|                                         | 1.7 | 1.673 | 21.49 | 49.03  | 12.02 | 56.09  | 33.51   |
|                                         | 1.8 | 3.408 | 13.4  | 43.41  | 17.97 | 38.66  | 31.37   |
|                                         | 0.9 | 7.558 | 27.55 | 13.68  | 1748  | 15.98  | 1775.55 |
| FeNi-Mo <sub>2</sub> C                  | 1.0 | 8.199 | 27.73 | 14.72  | 1861  | 18.14  | 1888.73 |
|                                         | 1.1 | 8.691 | 28.11 | 14.57  | 1668  | 20.36  | 1696.11 |
|                                         | 1.2 | 8.433 | 27.95 | 14.03  | 1721  | 24.76  | 1748.95 |
|                                         | 1.3 | 9.179 | 28.32 | 13.9   | 2875  | 31.07  | 2903.32 |
|                                         | 1.4 | 9.925 | 29.38 | 13.76  | 2708  | 32.62  | 2737.38 |
|                                         | 1.5 | 1.949 | 28.43 | 14.42  | 154.5 | 30.43  | 182.98  |
|                                         | 1.6 | 4.258 | 9.656 | 15.24  | 5     | 21.11  | 26.886  |
|                                         | 1.7 | 3.342 | 12.88 | 13.425 | 17.23 | 20.147 | 18.753  |
|                                         | 1.8 | 3.427 | 12.79 | 13.46  | 5.873 | 20.373 | 17.479  |
|                                         |     |       |       | 4.689  |       |        |         |

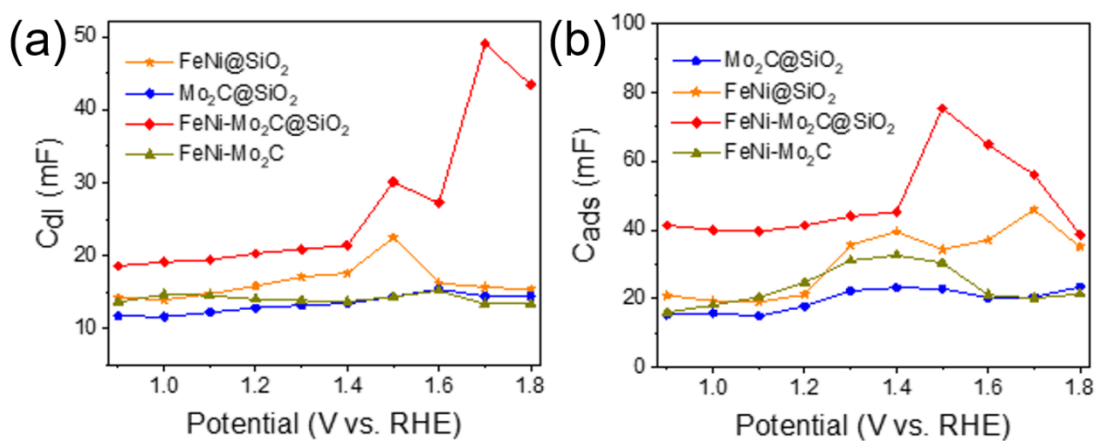

Figure S11 (a)  $C_{dl}$  and (b)  $C_{ads}$  with the increasing potential.
